# Supplementary material
Source: Springer Nature journal article supplement (https://www.springermedizin.de/resource/supplementary/13051_2010_102_MOESM19_ESM.pdf/9670010)

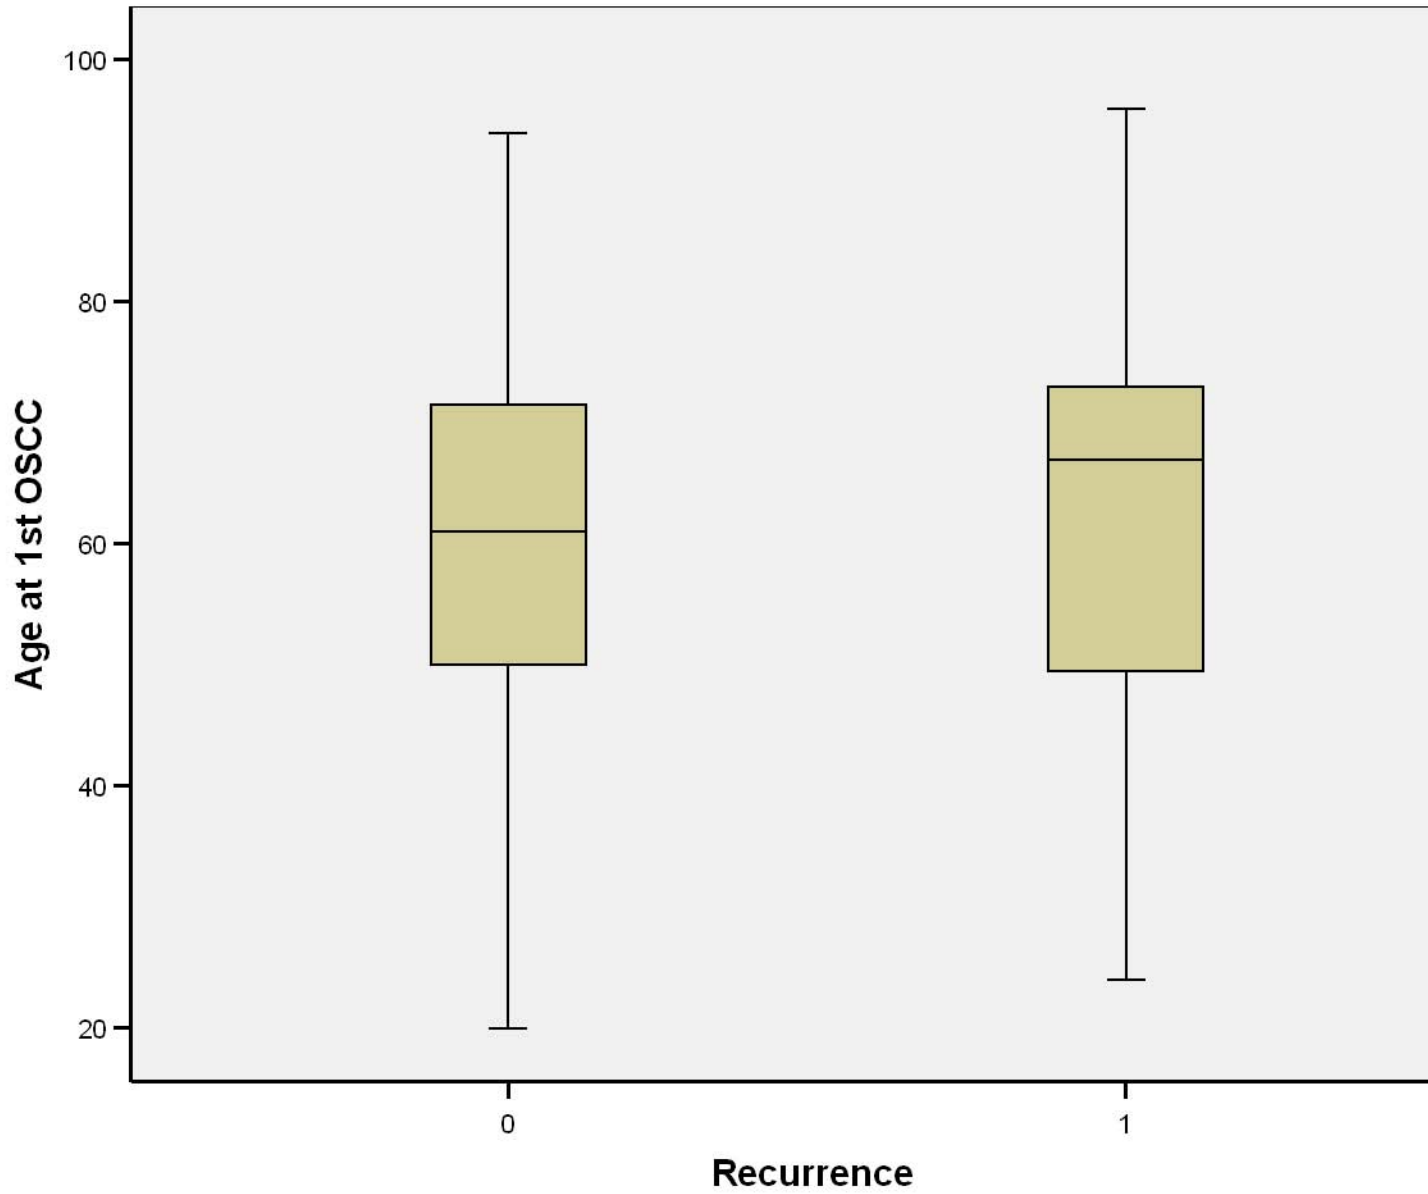

Supplement: MOESM19 [file 9670010]
